# Supplementary material for: Alkamides from Anacyclus pyrethrum L. and Their in Vitro Antiprotozoal Activity
Source: PubMed Central journal article supplement (PMC6154598; doi:10.3390/molecules22050796), 2017-05-12
Supplement: molecules-22-00796-s001.pdf [file molecules-22-00796-s001.pdf]

## Alkamides from *Anacyclus pyrethrum* L. and their *in vitro* antiprotozoal activity<sup>†</sup>

Julia B. Althaus<sup>1,†</sup>, Claudine Malyszek<sup>1,†</sup>, Marcel Kaiser<sup>2,3</sup>, Reto Brun<sup>2,3</sup> and Thomas J. Schmidt<sup>1,\*</sup>

<sup>1</sup> Institut für Pharmazeutische Biologie und Phytochemie (IPBP), University of Münster, PharmaCampus, Corrensstraße 48, Münster D-48149, Germany; E-Mail: [julia.althaus@uni-muenster.de](mailto:julia.althaus@uni-muenster.de) (J.B.A.)

<sup>2</sup> Swiss Tropical and Public Health Institute (Swiss TPH), Socinstrasse 57, Basel CH-4002, Switzerland; E-Mails: [marcel.kaiser@unibas.ch](mailto:marcel.kaiser@unibas.ch) (M.K.); [reto.brun@unibas.ch](mailto:reto.brun@unibas.ch) (R.B.)

<sup>3</sup> University of Basel, Petersplatz 1, Basel CH-4003, Switzerland

<sup>†</sup> Part of doctoral thesis of J. B. A. and MSc thesis of C. M.

\* Author to whom correspondence should be addressed; E-Mail: [thomschm@uni-muenster.de](mailto:thomschm@uni-muenster.de); Tel.: +49-251-83-33378; Fax: +49-251-83-38341.

Received: date; Accepted: date; Published: date

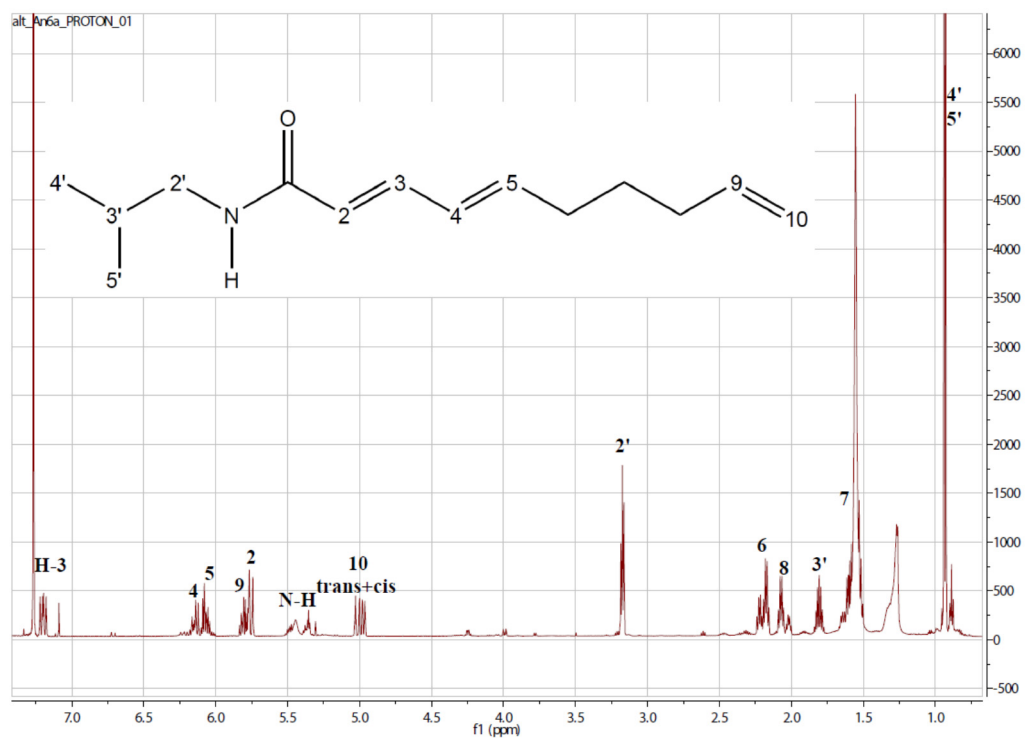

**Figure S1** <sup>1</sup>H NMR spectrum of compound 3 (CDCl<sub>3</sub>, 600 MHz).

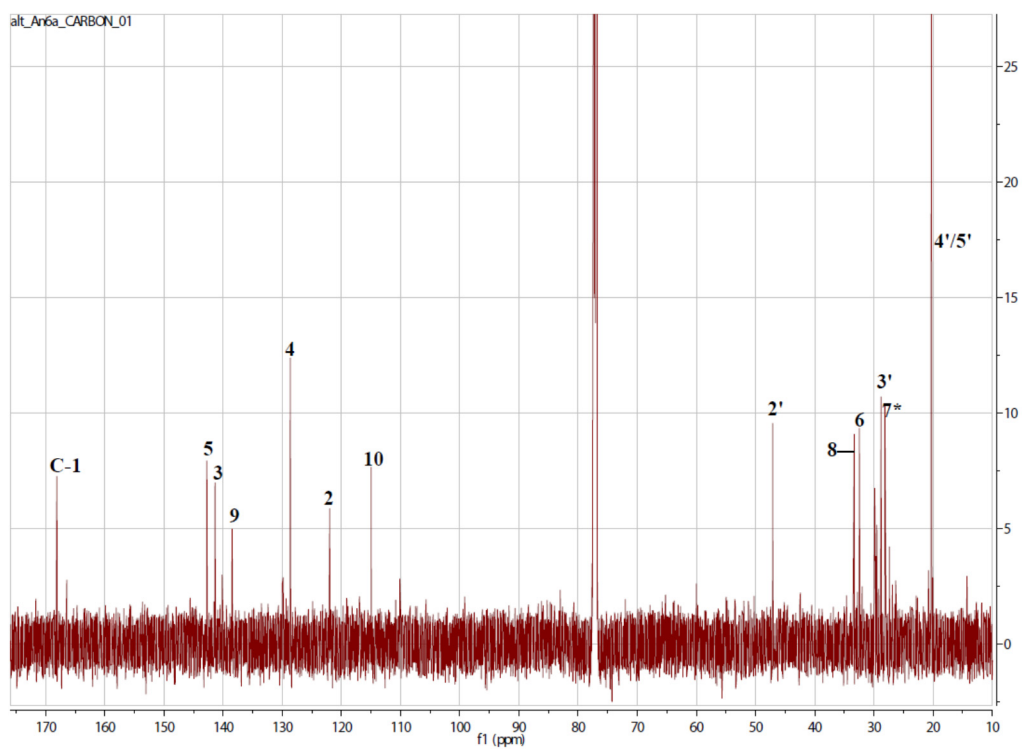

**Figure S2** <sup>13</sup>C NMR spectrum of compound 3 (CDCl<sub>3</sub>, 150 MHz)

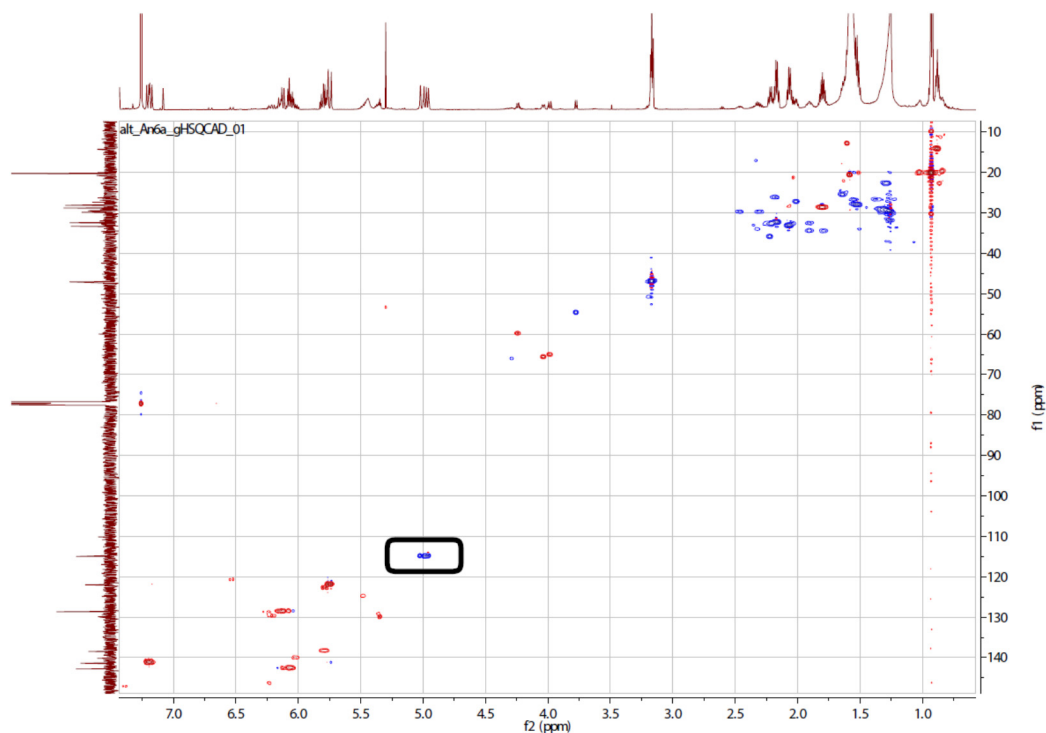

**Figure S3**  $^1\text{H}/^{13}\text{C}$  HSQC NMR spectrum of compound **3** in ( $\text{CDCl}_3$ , 600 MHz). Figure A5 shows a magnification of the marked area.

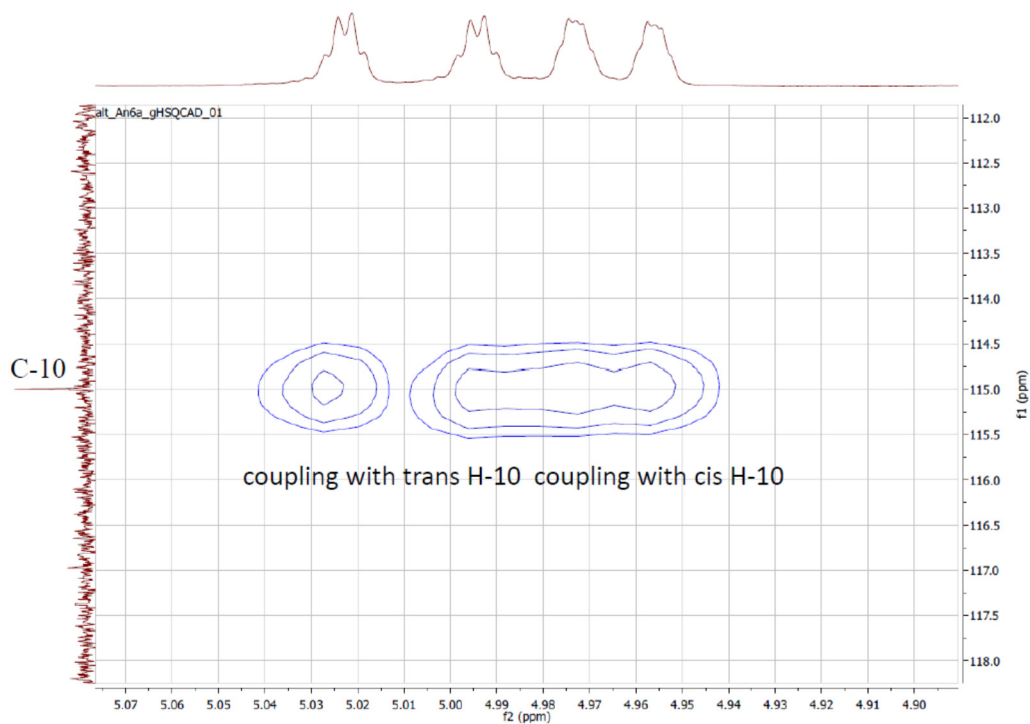

**Figure S4** Extracted section of the  $^1\text{H}/^{13}\text{C}$  HSQC NMR spectrum of compound **3** (compare Figure A3).

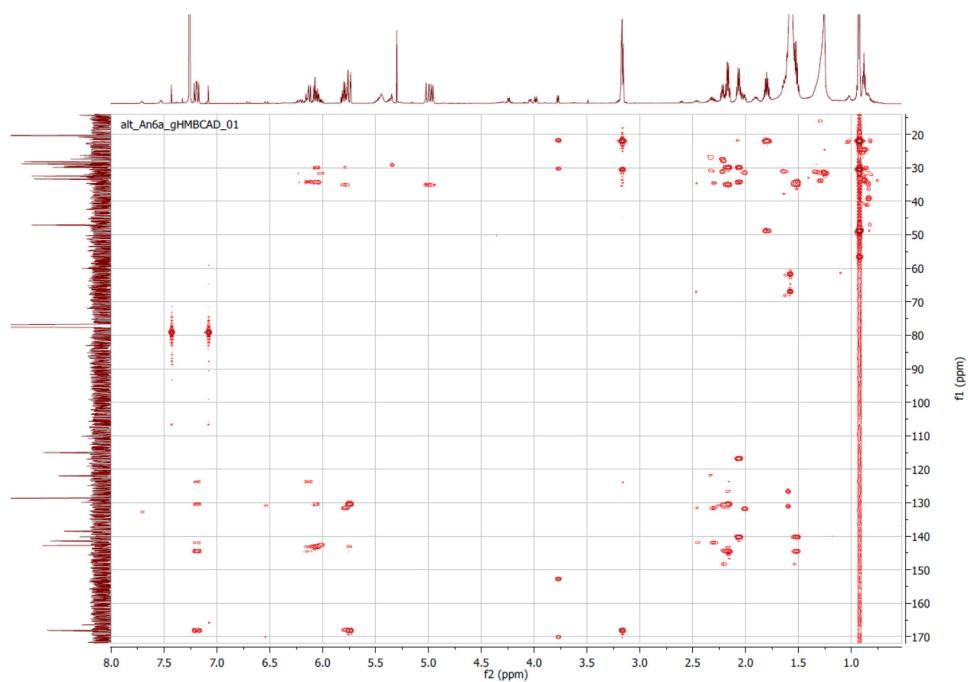

**Figure S5** <sup>1</sup>H/<sup>13</sup>C HMBC NMR spectrum of compound **3** in (CDCl<sub>3</sub>, 600 MHz).

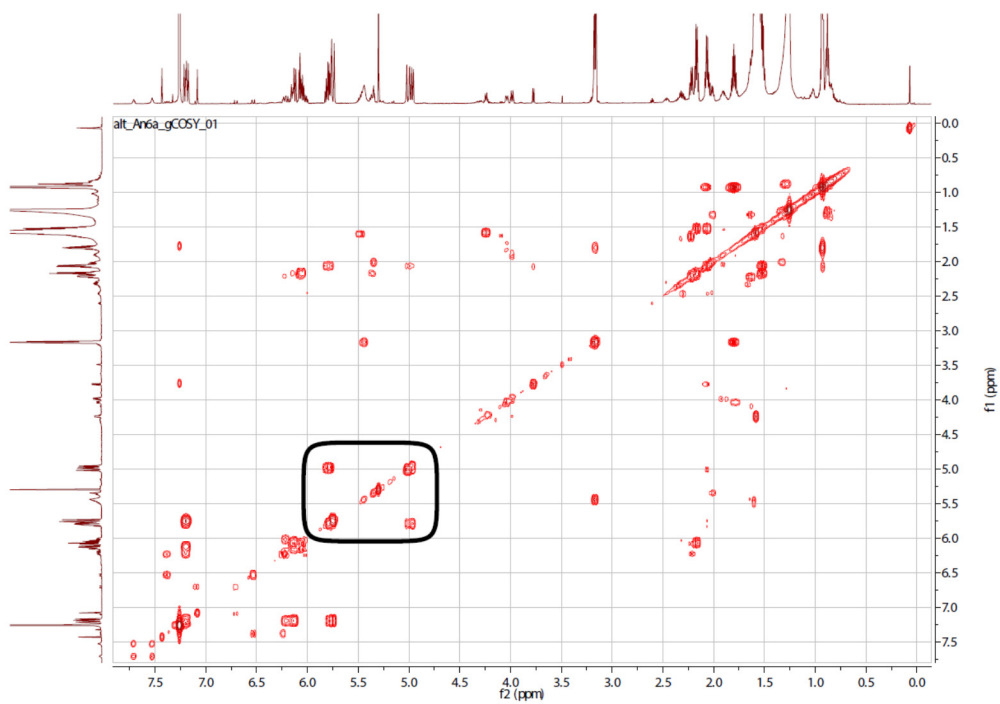

**Figure S6** <sup>1</sup>H/<sup>1</sup>H COSY NMR spectrum of compound **3** (CDCl<sub>3</sub>, 600 MHz). Figure A7 shows a magnification of the marked area.

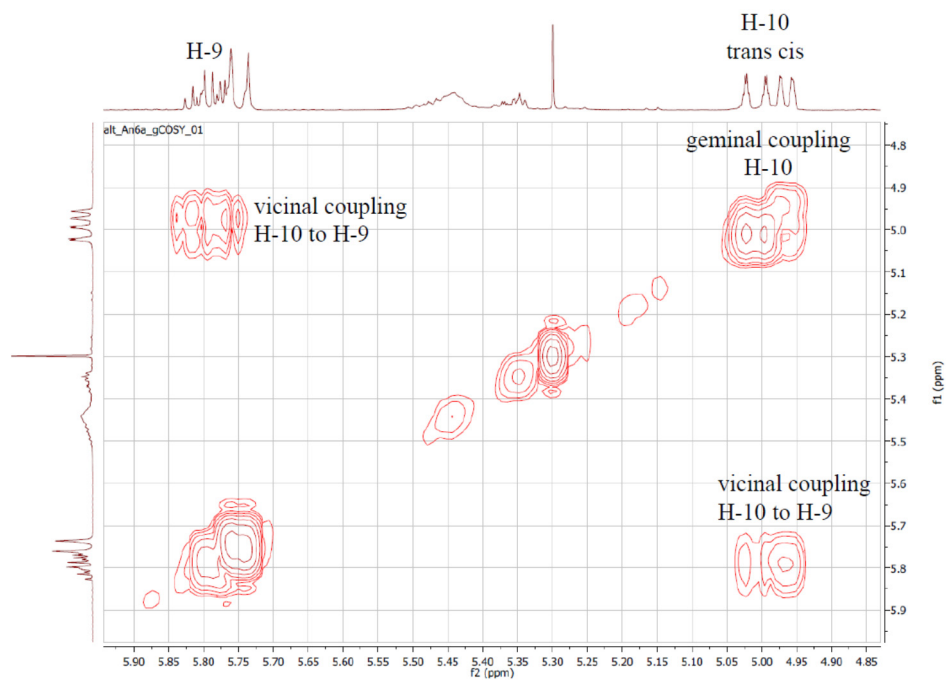

**Figure S7** Extracted section of the  $^1\text{H}/^1\text{H}$  COSY NMR spectrum of compound **3** (compare Figure A6).

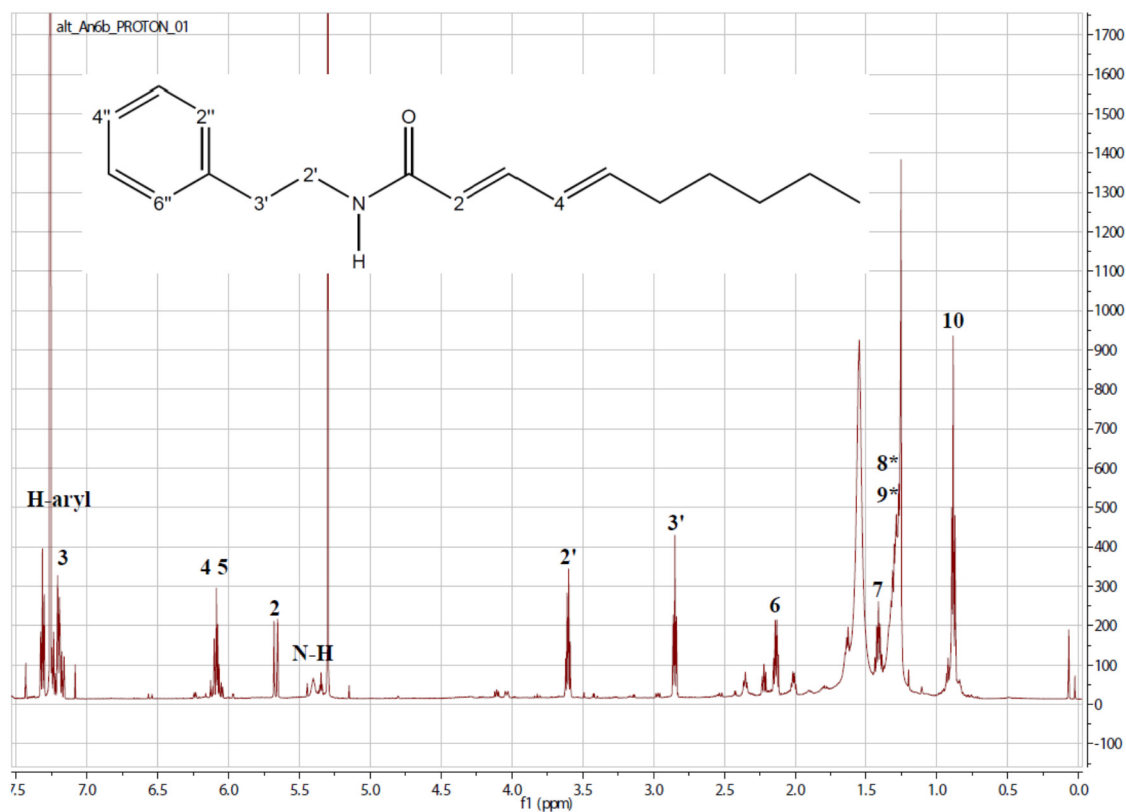

**Figure S8**  $^1\text{H}$  NMR spectrum of compound **4** ( $\text{CDCl}_3$ , 600 MHz).

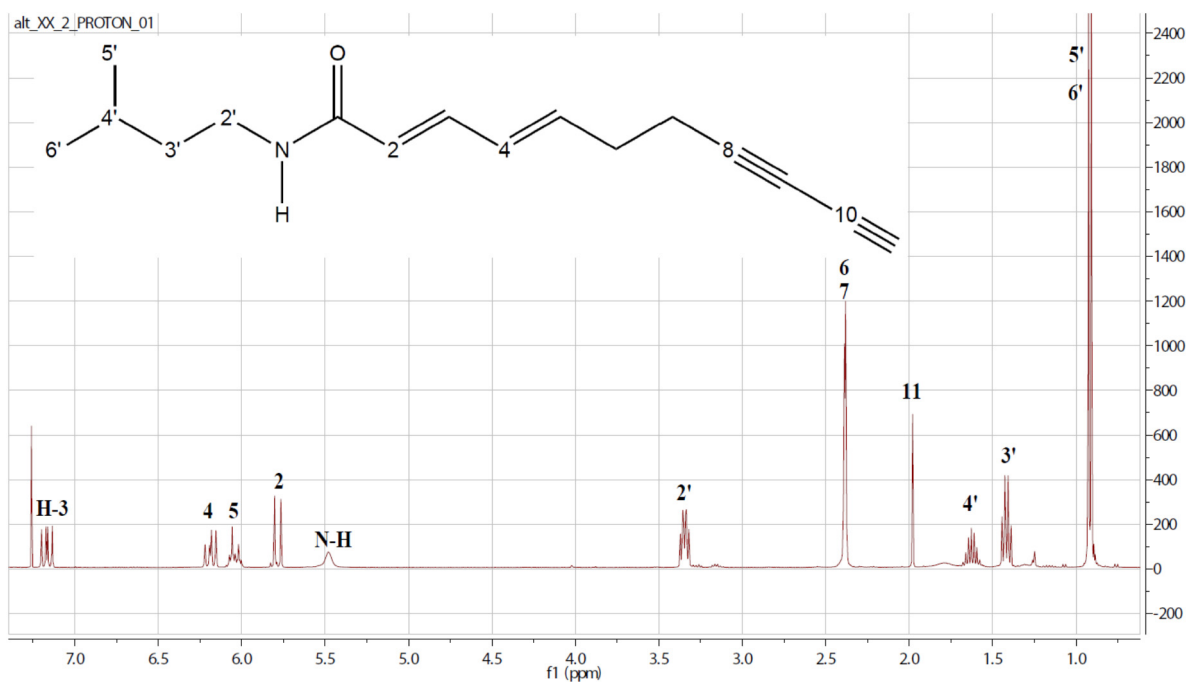

**Figure S9**  $^1\text{H}$  NMR spectrum of compound **5** ( $\text{CDCl}_3$ , 400 MHz).

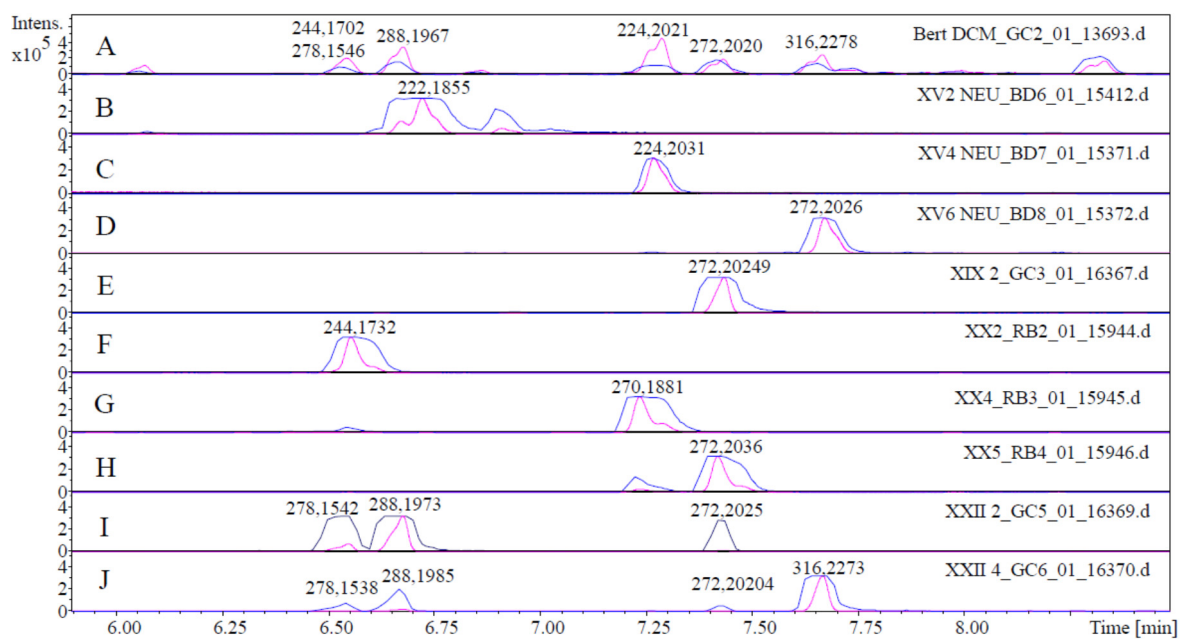

**Figure S10** UHPLC/ESI QqTOF MS-MS chromatogram of the dichloromethane extract of *A. pyrethrum* L. ((A)  $c = 10$  mg/mL) and of the isolated alkamides ((B-J)  $c = 0.1$  mg/mL; except (I)  $c = 0.2$  mg/mL) from *A. pyrethrum* L.: (B) compound **3**, (C) compound **2**, (D) compound **4**, (E) compound **1**, (F) compound **5**, (G) compound **6**, (H) compound **1**, (I) compound **8** and **9** [1:4] with a small amount of **1**, (J) compound **7** (impure). Blue: Base peak chromatogram at  $m/z$  100-500. Magenta: Base peak UV chromatogram at 260 nm.
